# Supplementary material
Source: Royal Society of Chemistry journal article supplement (doi:10.1039/d5fo04998a)
Supplement: d5fo04998a1.pdf [file d5fo04998a1.pdf]

## Supplementary material for

### **An innovative germination-driven LAB fermentation strategy for allergenicity reduction in soymilk gels through spatiotemporal protease-mediated epitope disruption**

Yaqiong Wang, Shijie Fang, Zhihao Fan, Yi Wang, Yue Wu, Xin Rui, Pei Wang,  
Chong Xie, Runqiang Yang \*

Sanya Institute of Nanjing Agricultural University, Whole Grain Food Engineering  
Research Center, College of Food Science and Technology, Nanjing Agricultural  
University, Nanjing, Jiangsu, 210095, China

\* Corresponding authors contact information:

Runqiang Yang

College of Food Science and Technology, Nanjing Agricultural University

1 Weigang Road, Nanjing, Jiangsu, China

Tel: +86 13813927131; Fax: +86 25 84396293;

E-mail address: yangrq@njau.edu.cn

## Supplementary methods

### 1. Antigenicity assay

100  $\mu$ L aliquots of each sample were dispensed into the wells of a microtiter plate and allowed to incubate at 25°C for 10 min. Subsequently, the wells were meticulously washed three times. Following this, 100  $\mu$ L of a horseradish peroxidase-conjugated secondary antibody was introduced into each well, and the plates were incubated again at the same temperature for an additional 10 min. After washing over three times, 100  $\mu$ L of substrate was added to each well and incubated for 10 min. The reaction was terminated by the addition of 100  $\mu$ L of stop solution, and the absorbance was then measured at a wavelength of 450 nm. The antigenicity was then calculated using a specific formula:

$$\text{Antigenicity (\%)} = \frac{\text{OD}_{450} [\text{S(S)M}]}{\text{OD}_{450} (\text{SM})} \times 100\%$$

### 2. IgE-binding capacity

Sera samples were obtained from individuals with varying severity of soybean allergies, supplied by Chongqing Wolcavi Biological Technology Co., Ltd., Chongqing, China. Prior consent was secured from all patients, and their sera were used in the study with appropriate acknowledgment. The patients included were aged 21, 51, 47, 31, and 28 years, with specific IgE levels of 67.5, 5.11, 6.07, 15.4, and 21.4 KU/L, respectively.

For the assay, 100  $\mu$ L of each serum sample was dispensed into wells of a 96-well ELISA plate and allowed to incubate overnight. The plates were then washed and treated with BSA-PBS to prevent nonspecific binding. Next, the plates were incubated

with diluted human serum and an anti-human IgE-peroxidase antibody. After further incubation and washing, 3,3',5,5'-Tetramethylbenzidine substrate was added, and the enzymatic reaction was halted with sulfuric acid. Finally, the absorbance was measured at a wavelength of 450 nm.

### **3. Peptidomic identification**

Initially, peptides were extracted from F(S)SM samples through the addition of trichloroacetic acid, followed by centrifugation at  $12,000 \times g$  for 15 min. The resulting supernatant, containing the peptide mixture, was then subjected to desalting by using a MonoSpin C<sub>18</sub> desalination column. Once desalted, the peptide solution was acidified with 0.1% formic acid (FA) and loaded onto a nano trap column. The elution process occurred at a flow rate of 4  $\mu\text{L}/\text{min}$ , utilizing a loading buffer composed of 2% acetonitrile. Subsequently, the peptide solution was eluted onto an analytical column using a gradient elution ranging from 3% to 45% of buffer B (acetonitrile containing 0.1% FA) at a flow rate of 0.3  $\mu\text{L}/\text{min}$ . The entire elution procedure lasted for 190 min. MS/MS acquisition in a data-dependent manner was performed utilizing an LTQ-Orbitrap XL mass spectrometer, with the spray voltage adjusted to 2.2 kV. The raw MS data files were subsequently processed using MaxQuant software (version 1.6.2.6), and these data were searched against the protein sequences available on the UniProt database. Carbamidomethylation of cysteine was set as a fixed modification, with protein N-terminal oxidation of methionine as a variable modification.

## Supplementary Results

**Table S1. The specific information of soy allergies.**

| Patients             | S1                                              | S2                                                                          | S3                                              | S4                                                                                                                                                         | S5                                                                                                                                                                                                                                     |
|----------------------|-------------------------------------------------|-----------------------------------------------------------------------------|-------------------------------------------------|------------------------------------------------------------------------------------------------------------------------------------------------------------|----------------------------------------------------------------------------------------------------------------------------------------------------------------------------------------------------------------------------------------|
| Classification       |                                                 |                                                                             | Allergic                                        |                                                                                                                                                            |                                                                                                                                                                                                                                        |
| Skin prick Test type |                                                 |                                                                             | Positive                                        |                                                                                                                                                            |                                                                                                                                                                                                                                        |
| Methodology          |                                                 |                                                                             | ImmunoCAP                                       |                                                                                                                                                            |                                                                                                                                                                                                                                        |
|                      |                                                 |                                                                             | Fluorometric Enzyme Immunoassay Analysis (FEIA) |                                                                                                                                                            |                                                                                                                                                                                                                                        |
| Ethnicity            | Asian                                           | Caucasian                                                                   | Other                                           | Caucasian                                                                                                                                                  | Asian                                                                                                                                                                                                                                  |
| Gender               | Male                                            | Male                                                                        | Female                                          | Female                                                                                                                                                     | Male                                                                                                                                                                                                                                   |
| Blood Type           | Not Known                                       | Not Known                                                                   | A+                                              | A+                                                                                                                                                         | Not Known                                                                                                                                                                                                                              |
| PLI                  |                                                 |                                                                             |                                                 |                                                                                                                                                            |                                                                                                                                                                                                                                        |
| Permanent ID         | 33776-LL                                        | 33906-AH                                                                    | 34507-HA                                        | 34945-ND                                                                                                                                                   | 28472-JT                                                                                                                                                                                                                               |
| Bleed Number         | PL 26569                                        | PL 27321                                                                    | PL 31516                                        | PL 29834                                                                                                                                                   | PL 28282                                                                                                                                                                                                                               |
| Birth Date           | 1973, 02, 01                                    | 1987, 09, 13                                                                | 2003, 01, 16                                    | 1996, 10, 22                                                                                                                                               | 1993, 10, 14                                                                                                                                                                                                                           |
| Draw Date            | 2019, 12, 17                                    | 2021, 01, 08                                                                | 2023, 10, 18                                    | 2022, 11, 09                                                                                                                                               | 2021, 11, 09                                                                                                                                                                                                                           |
| Diagnosis            | Allergic rhinitis, Filariasis, No immunotherapy | Allergic rhinitis, Multi-allergic, No immunotherapy, Vaccine for SARS-COV-2 | Allergic rhinitis, No immunotherapy             | Allergic rhinitis, Allergy diagnosed by a physician, No immunotherapy, No prior history of cancer, Patient has clinically relevant allergic symptomatology | Allergic rhinitis, Allergy diagnosed by a physician, Atopic dermatitis, Eczema, Elevated IgE, Multi-allergic, No prior history of cancer, Patient has clinically relevant allergic symptomatology, Shingles History, Yes-immunotherapy |

1 **Table S2. Particle size distribution of the fermented soymilk (FSM) and**  
 2 **fermented sprouted seeds-derived soymilk (FSSM) collected at different *L.***  
 3 ***plantarum* strains and fermented terminal pH values**

| Fermentation conditions        | Samples | D[4, 3]                     |
|--------------------------------|---------|-----------------------------|
| <i>L. Plantarum</i> O3, pH 5.5 | FSM     | 23.8 ± 0.4 μm <sup>d</sup>  |
|                                | FSSM-1  | 21.3 ± 0.3 μm <sup>g</sup>  |
|                                | FSSM-2  | 17.8 ± 0.4 μm <sup>i</sup>  |
|                                | FSSM-3  | 12.5 ± 0.3 μm <sup>n</sup>  |
| <i>L. Plantarum</i> P7, pH 5.5 | FSM     | 22.4 ± 0.6 μm <sup>ef</sup> |
|                                | FSSM-1  | 15.9 ± 0.2 μm <sup>j</sup>  |
|                                | FSSM-2  | 14.9 ± 0.2 μm <sup>l</sup>  |
|                                | FSSM-3  | 11.3 ± 0.3 μm <sup>pq</sup> |
| <i>L. Plantarum</i> T7, pH 5.5 | FSM     | 36.5 ± 1.2 μm <sup>a</sup>  |
|                                | FSSM-1  | 32.8 ± 0.4 μm <sup>b</sup>  |
|                                | FSSM-2  | 22.3 ± 0.2 μm <sup>f</sup>  |
|                                | FSSM-3  | 12.2 ± 0.1 μm <sup>no</sup> |
| <i>L. Plantarum</i> O3, pH 4.5 | FSM     | 23.1 ± 0.2 μm <sup>e</sup>  |
|                                | FSSM-1  | 19.3 ± 0.4 μm <sup>h</sup>  |
|                                | FSSM-2  | 11.7 ± 0.3 μm <sup>op</sup> |
|                                | FSSM-3  | 10.5 ± 0.3 μm <sup>qr</sup> |
| <i>L. Plantarum</i> P7, pH 4.5 | FSM     | 20.6 ± 0.4 μm <sup>g</sup>  |
|                                | FSSM-1  | 15.5 ± 0.1 μm <sup>k</sup>  |
|                                | FSSM-2  | 11.4 ± 0.1 μm <sup>p</sup>  |
|                                | FSSM-3  | 10.0 ± 0.2 μm <sup>r</sup>  |
| <i>L. Plantarum</i> T7, pH 4.5 | FSM     | 37.3 ± 0.5 μm <sup>a</sup>  |
|                                | FSSM-1  | 26.9 ± 0.4 μm <sup>c</sup>  |
|                                | FSSM-2  | 17.5 ± 0.2 μm <sup>i</sup>  |
|                                | FSSM-3  | 12.0 ± 0.1 μm <sup>o</sup>  |

|                                |        |                             |
|--------------------------------|--------|-----------------------------|
|                                | FSM    | 20.6 ± 0.5 μm <sup>g</sup>  |
| <i>L. Plantarum</i> O3, pH 4.0 | FSSM-1 | 13.9 ± 0.5 μm <sup>m</sup>  |
|                                | FSSM-2 | 10.9 ± 0.2 μm <sup>q</sup>  |
|                                | FSSM-3 | 10.1 ± 0.1 μm <sup>r</sup>  |
|                                | FSM    | 20.5 ± 0.5 μm <sup>g</sup>  |
| <i>L. Plantarum</i> P7, pH 4.0 | FSSM-1 | 13.8 ± 0.3 μm <sup>m</sup>  |
|                                | FSSM-2 | 10.6 ± 0.4 μm <sup>qr</sup> |
|                                | FSSM-3 | 10.0 ± 0.3 μm <sup>r</sup>  |
|                                | FSM    | 32.4 ± 0.3 μm <sup>b</sup>  |
| <i>L. Plantarum</i> T7, pH 4.0 | FSSM-1 | 22.8 ± 0.4 μm <sup>ef</sup> |
|                                | FSSM-2 | 15.1 ± 0.3 μm <sup>kl</sup> |
|                                | FSSM-3 | 11.6 ± 0.1 μm <sup>p</sup>  |

---

4 <sup>1</sup> Values after ± represent the standard deviations.

5 <sup>2 a-r</sup> Values followed by different letters in the same column are significantly different ( $p < 0.05$ ).

**Table S3. The distrution of major allergenic epitope degradation of FS(S)M gel derived from soybeans at different germination times.**

| Soy allergen<br>(Accession<br>number) | Region                             | Allergenic<br>epitope              | Samples                    |
|---------------------------------------|------------------------------------|------------------------------------|----------------------------|
| Gly m 5.01<br>(P0DO16)                | Region 1                           | E <sub>116</sub> -E <sub>124</sub> | FSSM-1, FSSM-2, and FSSM-3 |
|                                       |                                    | H <sub>117</sub> -E <sub>142</sub> |                            |
|                                       | Region 2                           | S <sub>137</sub> -E <sub>144</sub> | FSSM-3                     |
|                                       |                                    | N <sub>201</sub> -R <sub>215</sub> |                            |
| Gly m 5.02<br>(P11827)                | Region 3                           | E <sub>362</sub> -E <sub>378</sub> | FSSM-3                     |
|                                       | Region 4                           | K <sub>381</sub> -D <sub>403</sub> | FSSM-1, FSSM-2, and FSSM-3 |
|                                       |                                    | E <sub>382</sub> -N <sub>407</sub> |                            |
|                                       | Region 1                           | E <sub>118</sub> -E <sub>124</sub> | FSSM-2 and FSSM-3          |
|                                       | Region 2                           | Q <sub>151</sub> -E <sub>158</sub> | FSSM-1, FSSM-2, and FSSM-3 |
|                                       | Region 3                           | E <sub>173</sub> -D <sub>188</sub> | FSSM-2 and FSSM-3          |
| Region 4                              | H <sub>213</sub> -R <sub>218</sub> | FSSM-3                             |                            |
| Gly m 5.03<br>(P25974)                | Region 5                           | F <sub>575</sub> -K <sub>580</sub> | FSSM-3                     |
|                                       |                                    | L <sub>134</sub> -A <sub>149</sub> |                            |
|                                       | Region 1                           | D <sub>139</sub> -K <sub>154</sub> | FSSM-1, FSSM-2, and FSSM-3 |
|                                       |                                    | K <sub>144</sub> -D <sub>159</sub> |                            |
|                                       |                                    | L <sub>148</sub> -R <sub>157</sub> |                            |
|                                       |                                    | A <sub>149</sub> -S <sub>164</sub> |                            |
|                                       | Region 2                           | Q <sub>203</sub> -I <sub>210</sub> | FSSM-3                     |
|                                       |                                    | R <sub>204</sub> -R <sub>219</sub> |                            |
| V <sub>209</sub> -R <sub>224</sub>    |                                    |                                    |                            |
| V <sub>211</sub> -I <sub>218</sub>    |                                    |                                    |                            |
|                                       | S <sub>214</sub> -S <sub>229</sub> | FSSM-2 and FSSM-3                  |                            |
|                                       | R <sub>219</sub> -S <sub>234</sub> |                                    |                            |



|                          |                                    |                                    |                            |
|--------------------------|------------------------------------|------------------------------------|----------------------------|
|                          | Region 5                           | T <sub>292</sub> -P <sub>297</sub> |                            |
| Gly m 8<br>(P19594)      | Region 1                           | N <sub>39</sub> -I <sub>50</sub>   | FSSM-1, FSSM-2, and FSSM-3 |
|                          | Region 2                           | Q <sub>95</sub> -T <sub>99</sub>   |                            |
| Gly m TI<br>(P01070)     | Region 1                           | R <sub>55</sub> -G <sub>60</sub>   | FSSM-1, FSSM-2, and FSSM-3 |
|                          | Region 2                           | I <sub>89</sub> -L <sub>100</sub>  | FSSM-1, FSSM-2, and FSSM-3 |
|                          |                                    | A <sub>93</sub> -F <sub>102</sub>  |                            |
|                          | Region 1                           | S <sub>115</sub> -Q <sub>129</sub> | FSSM-3                     |
| Gly m Bd 30K<br>(P22895) | Region 2                           | H <sub>202</sub> -V <sub>209</sub> | FSSM-2 and FSSM-3          |
|                          |                                    | C <sub>230</sub> -I <sub>241</sub> |                            |
|                          | Region 3                           | N <sub>233</sub> -Y <sub>244</sub> | FSSM-3                     |
|                          | Region 4                           | Q <sub>236</sub> -L <sub>247</sub> |                            |
|                          |                                    | D <sub>251</sub> -F <sub>262</sub> | FSSM-3                     |
|                          |                                    | T <sub>254</sub> -A <sub>265</sub> |                            |
| Region 5                 | P <sub>296</sub> -S <sub>310</sub> | FSSM-2 and FSSM-3                  |                            |

---

**Table S4. The number of epitopes and their distribution of major soybean allergen.**

| <b>Soybean allergen</b> | <b>Number of epitopes</b> | <b>Amino acid sequence</b>                                                                                                                                                                                                                                                                                                                                                                                                                                                                                                                                                                                                                                                                                                                                                                                                                                                                                                                                                                                                                                                                                                                                                                       | <b>Sencondary structure</b>       |
|-------------------------|---------------------------|--------------------------------------------------------------------------------------------------------------------------------------------------------------------------------------------------------------------------------------------------------------------------------------------------------------------------------------------------------------------------------------------------------------------------------------------------------------------------------------------------------------------------------------------------------------------------------------------------------------------------------------------------------------------------------------------------------------------------------------------------------------------------------------------------------------------------------------------------------------------------------------------------------------------------------------------------------------------------------------------------------------------------------------------------------------------------------------------------------------------------------------------------------------------------------------------------|-----------------------------------|
| Gly m 1                 | 9                         | R <sub>5</sub> -L <sub>11</sub> , L <sub>18</sub> -V <sub>25</sub> , V <sub>25</sub> -C <sub>29</sub> , C <sub>28</sub> -G <sub>33</sub> , I <sub>38</sub> -C <sub>45</sub> , L <sub>44</sub> -A <sub>50</sub> , C <sub>67</sub> -Y <sub>71</sub> , R <sub>69</sub> -A <sub>75</sub> , N <sub>74</sub> -R <sub>79</sub>                                                                                                                                                                                                                                                                                                                                                                                                                                                                                                                                                                                                                                                                                                                                                                                                                                                                          | α-helix and random coil           |
| Gly m 2                 | 14                        | R <sub>4</sub> -F <sub>9</sub> , L <sub>15</sub> -G <sub>28</sub> , F <sub>18</sub> -V <sub>23</sub> , F <sub>18</sub> -S <sub>33</sub> , S <sub>20</sub> -S <sub>35</sub> , V <sub>24</sub> -H <sub>36</sub> , Q <sub>25</sub> -H <sub>39</sub> , S <sub>33</sub> -H <sub>39</sub> , S <sub>33</sub> -A <sub>49</sub> , H <sub>39</sub> -H <sub>46</sub> , R <sub>44</sub> -C <sub>52</sub> , L <sub>50</sub> -E <sub>55</sub> , E <sub>55</sub> -G <sub>60</sub> , S <sub>66</sub> -F <sub>70</sub>                                                                                                                                                                                                                                                                                                                                                                                                                                                                                                                                                                                                                                                                                            | α-helix, β-sheet, and random coil |
| Gly m 3                 | 7                         | A <sub>23</sub> -D <sub>29</sub> , D <sub>29</sub> -S <sub>36</sub> , W <sub>33</sub> -G <sub>88</sub> , T <sub>111</sub> -N <sub>116</sub> , V <sub>119</sub> -L <sub>126</sub> , G <sub>125</sub> -D <sub>130</sub> , I <sub>127</sub> -Y <sub>131</sub>                                                                                                                                                                                                                                                                                                                                                                                                                                                                                                                                                                                                                                                                                                                                                                                                                                                                                                                                       | α-helix, β-sheet, and random coil |
| Gly m 4                 | 33                        | E <sub>9</sub> -P <sub>13</sub> , N <sub>11</sub> -A <sub>15</sub> , P <sub>13</sub> -A <sub>17</sub> , K <sub>39</sub> -V <sub>44</sub> , E <sub>42</sub> -G <sub>46</sub> , N <sub>43</sub> -G <sub>46</sub> , G <sub>49</sub> -E <sub>63</sub> , I <sub>53</sub> -V <sub>67</sub> , T <sub>57</sub> -I <sub>71</sub> , T <sub>57</sub> -F <sub>66</sub> , F <sub>58</sub> -T <sub>64</sub> , D <sub>61</sub> -D <sub>75</sub> , G <sub>62</sub> -V <sub>67</sub> , I <sub>74</sub> -A <sub>77</sub> , I <sub>74</sub> -Y <sub>83</sub> , A <sub>77</sub> -L <sub>91</sub> , L <sub>79</sub> -Y <sub>83</sub> , S <sub>82</sub> -V <sub>86</sub> , S <sub>84</sub> -G <sub>87</sub> , V <sub>85</sub> -A <sub>90</sub> , K <sub>97</sub> -G <sub>111</sub> , V <sub>105</sub> -K <sub>119</sub> , N <sub>109</sub> -K <sub>115</sub> , Y <sub>120</sub> -G <sub>124</sub> , E <sub>121</sub> -D <sub>125</sub> , G <sub>124</sub> -P <sub>128</sub> , A <sub>126</sub> -E <sub>132</sub> , Q <sub>130</sub> -K <sub>134</sub> , L <sub>133</sub> -I <sub>147</sub> , K <sub>137</sub> -L <sub>151</sub> , A <sub>142</sub> -D <sub>156</sub> , H <sub>154</sub> -Y <sub>157</sub>              | α-helix, β-sheet, and random coil |
| Gly m 7                 | 9                         | K <sub>16</sub> -R <sub>24</sub> , K <sub>22</sub> -K <sub>27</sub> , H <sub>101</sub> -R <sub>117</sub> , K <sub>110</sub> -A <sub>116</sub> , G <sub>163</sub> -K <sub>170</sub> , E <sub>432</sub> -L <sub>438</sub> , Q <sub>445</sub> -P <sub>453</sub> , E <sub>450</sub> -G <sub>458</sub> , A <sub>634</sub> -G <sub>639</sub>                                                                                                                                                                                                                                                                                                                                                                                                                                                                                                                                                                                                                                                                                                                                                                                                                                                           | α-helix and random coil           |
| 2S albumin (Gly m 8)    | 32                        | L <sub>12</sub> -S <sub>20</sub> , S <sub>20</sub> -H <sub>26</sub> , Q <sub>27</sub> -R <sub>32</sub> , S <sub>30</sub> -L <sub>35</sub> , C <sub>31</sub> -P <sub>42</sub> , K <sub>33</sub> -N <sub>39</sub> , N <sub>39</sub> -I <sub>50</sub> , N <sub>39</sub> -K <sub>45</sub> , I <sub>67</sub> -I <sub>78</sub> , T <sub>70</sub> -K <sub>81</sub> , E <sub>87</sub> -C <sub>97</sub> , E <sub>90</sub> -L <sub>104</sub> , H <sub>93</sub> -P <sub>107</sub> , Q <sub>95</sub> -T <sub>99</sub> , K <sub>96</sub> -Q <sub>110</sub> , T <sub>99</sub> -A <sub>113</sub> , T <sub>99</sub> -L <sub>104</sub> , S <sub>102</sub> -A <sub>113</sub> , S <sub>102</sub> -K <sub>116</sub> , K <sub>105</sub> -D <sub>119</sub> , I <sub>108</sub> -S <sub>122</sub> , K <sub>108</sub> -I <sub>117</sub> , C <sub>111</sub> -L <sub>125</sub> , C <sub>111</sub> -K <sub>116</sub> , N <sub>120</sub> -K <sub>128</sub> , E <sub>127</sub> -I <sub>138</sub> , K <sub>132</sub> -F <sub>146</sub> , K <sub>135</sub> -M <sub>149</sub> , I <sub>138</sub> -C <sub>152</sub> , A <sub>141</sub> -S <sub>155</sub> , M <sub>143</sub> -P <sub>148</sub> , I <sub>150</sub> -S <sub>155</sub> | α-helix and random coil           |
| Kunitz trypsin          | 6                         | R <sub>55</sub> -G <sub>60</sub> , I <sub>89</sub> -L <sub>100</sub> , A <sub>93</sub> -F <sub>102</sub> , C <sub>111</sub> -T <sub>116</sub> , T <sub>116</sub> -V <sub>121</sub> ,                                                                                                                                                                                                                                                                                                                                                                                                                                                                                                                                                                                                                                                                                                                                                                                                                                                                                                                                                                                                             | β-sheet and random coil           |

|                                                                   |    |                                                                                                                                                                                                                                                                                                                                                                                                                                                                                                                                                                                                                                                                                                                                                                                                                                                                                                                                                                                                                                                                                                                                                                                                                                                                                                                                                                                                                                                                                                                                                                                                                                                                                                                                                                                                                                                                                                                                                                                                                                                                                                                                                                                                                                                                                                                                                                                                                                                                                                                                                                                                                                                                                                                                                                                                                                                                                                                                                                                                                                                                                                                                                                                                                                                                                                                                                                                                                                                                                                                                                                                                                                                                                                                                                                                                                                                                                                                                                                                                                                                                                                                                                                                                                                                                                                                                                                                                                                                                                                                                           |                                                     |
|-------------------------------------------------------------------|----|-------------------------------------------------------------------------------------------------------------------------------------------------------------------------------------------------------------------------------------------------------------------------------------------------------------------------------------------------------------------------------------------------------------------------------------------------------------------------------------------------------------------------------------------------------------------------------------------------------------------------------------------------------------------------------------------------------------------------------------------------------------------------------------------------------------------------------------------------------------------------------------------------------------------------------------------------------------------------------------------------------------------------------------------------------------------------------------------------------------------------------------------------------------------------------------------------------------------------------------------------------------------------------------------------------------------------------------------------------------------------------------------------------------------------------------------------------------------------------------------------------------------------------------------------------------------------------------------------------------------------------------------------------------------------------------------------------------------------------------------------------------------------------------------------------------------------------------------------------------------------------------------------------------------------------------------------------------------------------------------------------------------------------------------------------------------------------------------------------------------------------------------------------------------------------------------------------------------------------------------------------------------------------------------------------------------------------------------------------------------------------------------------------------------------------------------------------------------------------------------------------------------------------------------------------------------------------------------------------------------------------------------------------------------------------------------------------------------------------------------------------------------------------------------------------------------------------------------------------------------------------------------------------------------------------------------------------------------------------------------------------------------------------------------------------------------------------------------------------------------------------------------------------------------------------------------------------------------------------------------------------------------------------------------------------------------------------------------------------------------------------------------------------------------------------------------------------------------------------------------------------------------------------------------------------------------------------------------------------------------------------------------------------------------------------------------------------------------------------------------------------------------------------------------------------------------------------------------------------------------------------------------------------------------------------------------------------------------------------------------------------------------------------------------------------------------------------------------------------------------------------------------------------------------------------------------------------------------------------------------------------------------------------------------------------------------------------------------------------------------------------------------------------------------------------------------------------------------------------------------------------------------------------------------|-----------------------------------------------------|
| inhibitor<br>(Gly m<br>TI)<br>Lectin<br>(Gly m<br>Agglutini<br>n) | 4  | S <sub>205</sub> -R <sub>215</sub><br><br>Q <sub>134</sub> -Y <sub>139</sub> , F <sub>160</sub> -D <sub>165</sub> , F <sub>260</sub> -H <sub>266</sub> , H <sub>266</sub> -D <sub>272</sub>                                                                                                                                                                                                                                                                                                                                                                                                                                                                                                                                                                                                                                                                                                                                                                                                                                                                                                                                                                                                                                                                                                                                                                                                                                                                                                                                                                                                                                                                                                                                                                                                                                                                                                                                                                                                                                                                                                                                                                                                                                                                                                                                                                                                                                                                                                                                                                                                                                                                                                                                                                                                                                                                                                                                                                                                                                                                                                                                                                                                                                                                                                                                                                                                                                                                                                                                                                                                                                                                                                                                                                                                                                                                                                                                                                                                                                                                                                                                                                                                                                                                                                                                                                                                                                                                                                                                               | $\beta$ -sheet and<br>random coil                   |
| 7S $\alpha$<br>subunit<br>(Gly m<br>5.01)                         | 31 | F <sub>15</sub> -I <sub>25</sub> , S <sub>48</sub> -A <sub>56</sub> , A <sub>56</sub> -L <sub>61</sub> , E <sub>64</sub> -G <sub>71</sub> , E <sub>67</sub> -<br>E <sub>95</sub> , P <sub>76</sub> -E <sub>86</sub> ,<br>R <sub>102</sub> -R <sub>127</sub> , E <sub>116</sub> -E <sub>124</sub> , H <sub>117</sub> -E <sub>142</sub> , S <sub>137</sub> -E <sub>144</sub> ,<br>Q <sub>152</sub> -R <sub>177</sub> , D <sub>172</sub> -L <sub>197</sub> , E <sub>174</sub> -E <sub>180</sub> , S <sub>185</sub> -G <sub>199</sub> ,<br>N <sub>192</sub> -F <sub>220</sub> , K <sub>193</sub> -F <sub>207</sub> , N <sub>201</sub> -R <sub>215</sub> , N <sub>209</sub> -<br>R <sub>223</sub> , L <sub>217</sub> -R <sub>231</sub> , Q <sub>226</sub> -T <sub>244</sub> , L <sub>227</sub> -D <sub>252</sub> ,<br>T <sub>263</sub> -T <sub>291</sub> , Y <sub>293</sub> -S <sub>321</sub> , F <sub>322</sub> -E <sub>343</sub> , E <sub>362</sub> -E <sub>378</sub> ,<br>K <sub>381</sub> -D <sub>403</sub> , E <sub>382</sub> -N <sub>407</sub> , S <sub>401</sub> -N <sub>430</sub> , D <sub>412</sub> -<br>D <sub>437</sub> , N <sub>523</sub> -Q <sub>543</sub> , Q <sub>573</sub> -R <sub>602</sub><br>Y <sub>27</sub> -Q <sub>31</sub> , Q <sub>31</sub> -K <sub>37</sub> , R <sub>40</sub> -E <sub>45</sub> , K <sub>62</sub> -Q <sub>73</sub> , V <sub>63</sub> -<br>I <sub>74</sub> , R <sub>76</sub> -K <sub>92</sub> ,<br>Q <sub>88</sub> -P <sub>102</sub> , E <sub>94</sub> -R <sub>101</sub> , D <sub>95</sub> -R <sub>109</sub> , P <sub>106</sub> -Q <sub>110</sub> ,<br>Q <sub>110</sub> -E <sub>115</sub> ,<br>E <sub>118</sub> -E <sub>124</sub> , K <sub>128</sub> -G <sub>133</sub> , S <sub>137</sub> -E <sub>145</sub> , E <sub>145</sub> -H <sub>150</sub> ,<br>Q <sub>151</sub> -E <sub>158</sub> , H <sub>160</sub> -H <sub>169</sub> , E <sub>173</sub> -E <sub>177</sub> , E <sub>177</sub> -<br>K <sub>188</sub> , E <sub>190</sub> -P <sub>203</sub> , H <sub>213</sub> -R <sub>218</sub> , R <sub>218</sub> -F <sub>223</sub> ,<br>N <sub>225</sub> -R <sub>231</sub> , N <sub>237</sub> -Q <sub>244</sub> , S <sub>240</sub> -R <sub>247</sub> , L <sub>263</sub> -<br>D <sub>268</sub> , S <sub>292</sub> -Q <sub>296</sub> , L <sub>301</sub> -G <sub>306</sub> , M <sub>322</sub> -R <sub>334</sub> ,<br>F <sub>339</sub> -S <sub>354</sub> , G <sub>375</sub> -Q <sub>380</sub> , E <sub>384</sub> -E <sub>394</sub> , K <sub>398</sub> -L <sub>403</sub> ,<br>T <sub>443</sub> -D <sub>451</sub> , D <sub>451</sub> -K <sub>474</sub> , V <sub>454</sub> -D <sub>460</sub> , E <sub>463</sub> -<br>F <sub>467</sub> , I <sub>481</sub> -N <sub>487</sub> , I <sub>493</sub> -Q <sub>498</sub> , N <sub>533</sub> -D <sub>537</sub> , D <sub>581</sub> -<br>K <sub>587</sub> , F <sub>575</sub> -K <sub>580</sub> , K <sub>587</sub> -S <sub>592</sub> , A <sub>597</sub> -Q <sub>601</sub><br>F <sub>16</sub> -S <sub>23</sub> , L <sub>24</sub> -S <sub>39</sub> , E <sub>28</sub> -R <sub>37</sub> , D <sub>29</sub> -T <sub>44</sub> , Y <sub>35</sub> -<br>N <sub>48</sub> , S <sub>39</sub> -R <sub>54</sub> ,<br>T <sub>44</sub> -F <sub>59</sub> , Q <sub>49</sub> -P <sub>64</sub> , Q <sub>49</sub> -Q <sub>57</sub> , R <sub>54</sub> -L <sub>69</sub> , L <sub>55</sub> -<br>F <sub>59</sub> , F <sub>59</sub> -I <sub>74</sub> ,<br>S <sub>63</sub> -N <sub>68</sub> , S <sub>63</sub> -R <sub>70</sub> , E <sub>67</sub> -D <sub>71</sub> , Y <sub>72</sub> -K <sub>80</sub> , I <sub>74</sub> -<br>H <sub>89</sub> , I <sub>84</sub> -L <sub>99</sub> ,<br>H <sub>89</sub> -I <sub>104</sub> , F <sub>97</sub> -L <sub>105</sub> , L <sub>99</sub> -D <sub>114</sub> , A <sub>103</sub> -R <sub>113</sub> ,<br>I <sub>104</sub> -H <sub>119</sub> ,<br>S <sub>115</sub> -P <sub>120</sub> , H <sub>119</sub> -L <sub>134</sub> , D <sub>122</sub> -P <sub>127</sub> , I <sub>126</sub> -K <sub>144</sub> ,<br>G <sub>129</sub> -K <sub>144</sub> ,<br>Y <sub>133</sub> -N <sub>142</sub> , L <sub>134</sub> -A <sub>149</sub> , D <sub>139</sub> -K <sub>154</sub> , K <sub>144</sub> -<br>D <sub>159</sub> , L <sub>148</sub> -R <sub>157</sub> ,<br>A <sub>149</sub> -S <sub>164</sub> , K <sub>154</sub> -D <sub>159</sub> , Y <sub>158</sub> -R <sub>194</sub> , Q <sub>174</sub> -<br>F <sub>189</sub> , L <sub>181</sub> -R <sub>194</sub> ,<br>S <sub>184</sub> -E <sub>199</sub> , N <sub>193</sub> -G <sub>198</sub> , V <sub>195</sub> -R <sub>204</sub> , V <sub>195</sub> - | $\alpha$ -helix, $\beta$ -sheet,<br>and random coil |
| 7S $\alpha'$<br>subunit<br>(Gly m<br>5.02)                        | 44 | E <sub>118</sub> -E <sub>124</sub> , K <sub>128</sub> -G <sub>133</sub> , S <sub>137</sub> -E <sub>145</sub> , E <sub>145</sub> -H <sub>150</sub> ,<br>Q <sub>151</sub> -E <sub>158</sub> , H <sub>160</sub> -H <sub>169</sub> , E <sub>173</sub> -E <sub>177</sub> , E <sub>177</sub> -<br>K <sub>188</sub> , E <sub>190</sub> -P <sub>203</sub> , H <sub>213</sub> -R <sub>218</sub> , R <sub>218</sub> -F <sub>223</sub> ,<br>N <sub>225</sub> -R <sub>231</sub> , N <sub>237</sub> -Q <sub>244</sub> , S <sub>240</sub> -R <sub>247</sub> , L <sub>263</sub> -<br>D <sub>268</sub> , S <sub>292</sub> -Q <sub>296</sub> , L <sub>301</sub> -G <sub>306</sub> , M <sub>322</sub> -R <sub>334</sub> ,<br>F <sub>339</sub> -S <sub>354</sub> , G <sub>375</sub> -Q <sub>380</sub> , E <sub>384</sub> -E <sub>394</sub> , K <sub>398</sub> -L <sub>403</sub> ,<br>T <sub>443</sub> -D <sub>451</sub> , D <sub>451</sub> -K <sub>474</sub> , V <sub>454</sub> -D <sub>460</sub> , E <sub>463</sub> -<br>F <sub>467</sub> , I <sub>481</sub> -N <sub>487</sub> , I <sub>493</sub> -Q <sub>498</sub> , N <sub>533</sub> -D <sub>537</sub> , D <sub>581</sub> -<br>K <sub>587</sub> , F <sub>575</sub> -K <sub>580</sub> , K <sub>587</sub> -S <sub>592</sub> , A <sub>597</sub> -Q <sub>601</sub><br>F <sub>16</sub> -S <sub>23</sub> , L <sub>24</sub> -S <sub>39</sub> , E <sub>28</sub> -R <sub>37</sub> , D <sub>29</sub> -T <sub>44</sub> , Y <sub>35</sub> -<br>N <sub>48</sub> , S <sub>39</sub> -R <sub>54</sub> ,<br>T <sub>44</sub> -F <sub>59</sub> , Q <sub>49</sub> -P <sub>64</sub> , Q <sub>49</sub> -Q <sub>57</sub> , R <sub>54</sub> -L <sub>69</sub> , L <sub>55</sub> -<br>F <sub>59</sub> , F <sub>59</sub> -I <sub>74</sub> ,<br>S <sub>63</sub> -N <sub>68</sub> , S <sub>63</sub> -R <sub>70</sub> , E <sub>67</sub> -D <sub>71</sub> , Y <sub>72</sub> -K <sub>80</sub> , I <sub>74</sub> -<br>H <sub>89</sub> , I <sub>84</sub> -L <sub>99</sub> ,<br>H <sub>89</sub> -I <sub>104</sub> , F <sub>97</sub> -L <sub>105</sub> , L <sub>99</sub> -D <sub>114</sub> , A <sub>103</sub> -R <sub>113</sub> ,<br>I <sub>104</sub> -H <sub>119</sub> ,<br>S <sub>115</sub> -P <sub>120</sub> , H <sub>119</sub> -L <sub>134</sub> , D <sub>122</sub> -P <sub>127</sub> , I <sub>126</sub> -K <sub>144</sub> ,<br>G <sub>129</sub> -K <sub>144</sub> ,<br>Y <sub>133</sub> -N <sub>142</sub> , L <sub>134</sub> -A <sub>149</sub> , D <sub>139</sub> -K <sub>154</sub> , K <sub>144</sub> -<br>D <sub>159</sub> , L <sub>148</sub> -R <sub>157</sub> ,<br>A <sub>149</sub> -S <sub>164</sub> , K <sub>154</sub> -D <sub>159</sub> , Y <sub>158</sub> -R <sub>194</sub> , Q <sub>174</sub> -<br>F <sub>189</sub> , L <sub>181</sub> -R <sub>194</sub> ,<br>S <sub>184</sub> -E <sub>199</sub> , N <sub>193</sub> -G <sub>198</sub> , V <sub>195</sub> -R <sub>204</sub> , V <sub>195</sub> -                                                                                                                                                                                                                                                                                                                                                                                                                                                                                                                                                                                                                                                                                                                                                                                                                                                                                                                                                                                                                                                                                                                                                                                                                                                                                                                                                                                                                                                                                                                                                                                                                                 | $\alpha$ -helix, $\beta$ -sheet,<br>and random coil |
| 7S $\beta$<br>subunit<br>(Gly m<br>5.03)                          | 75 | H <sub>89</sub> -I <sub>104</sub> , F <sub>97</sub> -L <sub>105</sub> , L <sub>99</sub> -D <sub>114</sub> , A <sub>103</sub> -R <sub>113</sub> ,<br>I <sub>104</sub> -H <sub>119</sub> ,<br>S <sub>115</sub> -P <sub>120</sub> , H <sub>119</sub> -L <sub>134</sub> , D <sub>122</sub> -P <sub>127</sub> , I <sub>126</sub> -K <sub>144</sub> ,<br>G <sub>129</sub> -K <sub>144</sub> ,<br>Y <sub>133</sub> -N <sub>142</sub> , L <sub>134</sub> -A <sub>149</sub> , D <sub>139</sub> -K <sub>154</sub> , K <sub>144</sub> -<br>D <sub>159</sub> , L <sub>148</sub> -R <sub>157</sub> ,<br>A <sub>149</sub> -S <sub>164</sub> , K <sub>154</sub> -D <sub>159</sub> , Y <sub>158</sub> -R <sub>194</sub> , Q <sub>174</sub> -<br>F <sub>189</sub> , L <sub>181</sub> -R <sub>194</sub> ,<br>S <sub>184</sub> -E <sub>199</sub> , N <sub>193</sub> -G <sub>198</sub> , V <sub>195</sub> -R <sub>204</sub> , V <sub>195</sub> -                                                                                                                                                                                                                                                                                                                                                                                                                                                                                                                                                                                                                                                                                                                                                                                                                                                                                                                                                                                                                                                                                                                                                                                                                                                                                                                                                                                                                                                                                                                                                                                                                                                                                                                                                                                                                                                                                                                                                                                                                                                                                                                                                                                                                                                                                                                                                                                                                                                                                                                                                                                                                                                                                                                                                                                                                                                                                                                                                                                                                                                                                                                                                                                                                                                                                                                                                                                                                                                                                                                                                                                                              | $\alpha$ -helix, $\beta$ -sheet,<br>and random coil |

|                                       |    |  |                                                                                                                                                                                                                                                                                                                                                                                                                                                                                                                                                                                                                                                                                                                                                                                                                                                                                                                                                                                                                                                                                                                                                                                                                                                                                                                                                                                                                                                                                                                                                                                                                                                                                                                                                                                                                                                                                                                                                                                                                                                                                                                                                                                                                                                                                                                                                                                                                                                                                                                                                                                                                                                                        |                                                                                 |
|---------------------------------------|----|--|------------------------------------------------------------------------------------------------------------------------------------------------------------------------------------------------------------------------------------------------------------------------------------------------------------------------------------------------------------------------------------------------------------------------------------------------------------------------------------------------------------------------------------------------------------------------------------------------------------------------------------------------------------------------------------------------------------------------------------------------------------------------------------------------------------------------------------------------------------------------------------------------------------------------------------------------------------------------------------------------------------------------------------------------------------------------------------------------------------------------------------------------------------------------------------------------------------------------------------------------------------------------------------------------------------------------------------------------------------------------------------------------------------------------------------------------------------------------------------------------------------------------------------------------------------------------------------------------------------------------------------------------------------------------------------------------------------------------------------------------------------------------------------------------------------------------------------------------------------------------------------------------------------------------------------------------------------------------------------------------------------------------------------------------------------------------------------------------------------------------------------------------------------------------------------------------------------------------------------------------------------------------------------------------------------------------------------------------------------------------------------------------------------------------------------------------------------------------------------------------------------------------------------------------------------------------------------------------------------------------------------------------------------------------|---------------------------------------------------------------------------------|
|                                       |    |  | <p>K<sub>215</sub>, L<sub>196</sub>-E<sub>202</sub>,<br/> Q<sub>203</sub>-I<sub>210</sub>, R<sub>204</sub>-R<sub>219</sub>, V<sub>209</sub>-R<sub>224</sub>, V<sub>211</sub>-I<sub>218</sub>,<br/> S<sub>214</sub>-S<sub>229</sub>,<br/> R<sub>219</sub>-S<sub>234</sub>, R<sub>224</sub>-P<sub>239</sub>, S<sub>234</sub>-Y<sub>249</sub>, P<sub>239</sub>-G<sub>254</sub>,<br/> S<sub>244</sub>-I<sub>259</sub>,<br/> Y<sub>249</sub>-N<sub>264</sub>, G<sub>254</sub>-D<sub>269</sub>, I<sub>259</sub>-L<sub>274</sub>, N<sub>264</sub>-I<sub>279</sub>,<br/> D<sub>269</sub>-L<sub>284</sub>, D<sub>269</sub>-K<sub>292</sub>, I<sub>272</sub>-N<sub>280</sub>, L<sub>274</sub>-F<sub>289</sub>,<br/> I<sub>279</sub>-I<sub>294</sub>, F<sub>289</sub>-A<sub>304</sub>,<br/> V<sub>295</sub>-E<sub>301</sub>, A<sub>344</sub>-L<sub>359</sub>, A<sub>345</sub>-V<sub>350</sub>, S<sub>354</sub>-<br/> Q<sub>369</sub>, A<sub>374</sub>-Q<sub>389</sub>, N<sub>379</sub>-P<sub>394</sub>, Q<sub>389</sub>-L<sub>404</sub>,<br/> P<sub>394</sub>-E<sub>409</sub>, D<sub>399</sub>-D<sub>414</sub>, L<sub>404</sub>-Q<sub>419</sub>, Q<sub>419</sub>-I<sub>434</sub>,<br/> S<sub>424</sub>-Y<sub>439</sub><br/> T<sub>35</sub>-S<sub>49</sub>, L<sub>65</sub>-N<sub>79</sub>, I<sub>75</sub>-R<sub>89</sub>, P<sub>85</sub>-T<sub>99</sub>, K<sub>105</sub>-<br/> K<sub>119</sub>, S<sub>115</sub>-Q<sub>129</sub>,<br/> P<sub>135</sub>-Q<sub>149</sub>, E<sub>192</sub>-G<sub>200</sub>, E<sub>193</sub>-E<sub>207</sub>, N<sub>199</sub>-<br/> W<sub>208</sub>, H<sub>202</sub>-V<sub>209</sub>,<br/> K<sub>226</sub>-T<sub>240</sub>, C<sub>230</sub>-I<sub>241</sub>, N<sub>233</sub>-Y<sub>244</sub>, Q<sub>236</sub>-L<sub>247</sub>,<br/> D<sub>242</sub>-S<sub>253</sub>, D<sub>251</sub>-F<sub>262</sub>, T<sub>254</sub>-A<sub>265</sub>, P<sub>296</sub>-S<sub>310</sub>,<br/> E<sub>325</sub>-T<sub>339</sub>, A<sub>366</sub>-L<sub>379</sub></p>                                                                                                                                                                                                                                                                                                                                                                                                                                                                                                                                                                                                                                                                                                       |                                                                                 |
| P34 (Gly<br>m Bd 21<br>34K)           |    |  |                                                                                                                                                                                                                                                                                                                                                                                                                                                                                                                                                                                                                                                                                                                                                                                                                                                                                                                                                                                                                                                                                                                                                                                                                                                                                                                                                                                                                                                                                                                                                                                                                                                                                                                                                                                                                                                                                                                                                                                                                                                                                                                                                                                                                                                                                                                                                                                                                                                                                                                                                                                                                                                                        | <p><math>\alpha</math>-helix, <math>\beta</math>-sheet,<br/>and random coil</p> |
| P28 (Gly<br>m Bd 3<br>28K)            |    |  | <p>G<sub>31</sub>-S<sub>45</sub>, L<sub>59</sub>-I<sub>73</sub>, E<sub>157</sub>-H<sub>171</sub></p>                                                                                                                                                                                                                                                                                                                                                                                                                                                                                                                                                                                                                                                                                                                                                                                                                                                                                                                                                                                                                                                                                                                                                                                                                                                                                                                                                                                                                                                                                                                                                                                                                                                                                                                                                                                                                                                                                                                                                                                                                                                                                                                                                                                                                                                                                                                                                                                                                                                                                                                                                                   | <p><math>\alpha</math>-helix, <math>\beta</math>-sheet,<br/>and random coil</p> |
| 11S<br>glycinin<br>G1 (Gly<br>m 6.01) | 34 |  | <p>S<sub>14</sub>-F<sub>20</sub>, Q<sub>25</sub>-Q<sub>34</sub>, P<sub>41</sub>-E<sub>46</sub>, R<sub>44</sub>-G<sub>49</sub>, N<sub>86</sub>-<br/> E<sub>90</sub>, I<sub>103</sub>-E<sub>113</sub>,<br/> P<sub>105</sub>-S<sub>123</sub>, E<sub>113</sub>-G<sub>121</sub>, G<sub>121</sub>-D<sub>128</sub>, P<sub>126</sub>-Q<sub>131</sub>,<br/> I<sub>142</sub>-G<sub>147</sub>, E<sub>191</sub>-G<sub>200</sub>, F<sub>192</sub>-E<sub>198</sub>, Q<sub>196</sub>-Q<sub>203</sub>,<br/> H<sub>202</sub>-G<sub>207</sub>, K<sub>208</sub>-E<sub>213</sub>, G<sub>217</sub>-L<sub>229</sub>, S<sub>222</sub>-<br/> D<sub>236</sub>, G<sub>223</sub>-F<sub>228</sub>, G<sub>223</sub>-V<sub>235</sub>, F<sub>228</sub>-A<sub>232</sub>,<br/> E<sub>230</sub>-D<sub>236</sub>, N<sub>242</sub>-E<sub>246</sub>, Q<sub>244</sub>-E<sub>248</sub>, G<sub>253</sub>-I<sub>265</sub>,<br/> L<sub>262</sub>-P<sub>267</sub>,<br/> P<sub>268</sub>-Q<sub>274</sub>, Q<sub>274</sub>-E<sub>279</sub>, E<sub>281</sub>-K<sub>287</sub>, E<sub>286</sub>-C<sub>290</sub>,<br/> K<sub>293</sub>-C<sub>297</sub>, E<sub>314</sub>-T<sub>318</sub>, F<sub>370</sub>-L<sub>376</sub>, F<sub>482</sub>-K<sub>491</sub><br/> M<sub>1</sub>-G<sub>15</sub>, K<sub>3</sub>-F<sub>17</sub>, C<sub>9</sub>-A<sub>23</sub>, L<sub>12</sub>-A<sub>18</sub>, L<sub>19</sub>-<br/> Q<sub>31</sub>, N<sub>40</sub>-G<sub>46</sub>,<br/> S<sub>44</sub>-I<sub>49</sub>, K<sub>57</sub>-A<sub>65</sub>, K<sub>57</sub>-L<sub>71</sub>, A<sub>65</sub>-P<sub>79</sub>, R<sub>73</sub>-<br/> E<sub>87</sub>, Y<sub>81</sub>-G<sub>95</sub>, N<sub>83</sub>-F<sub>97</sub>, Y<sub>89</sub>-G<sub>103</sub>, Q<sub>91</sub>-P<sub>105</sub>,<br/> F<sub>97</sub>-P<sub>111</sub>, I<sub>100</sub>-Y<sub>108</sub>,<br/> E<sub>110</sub>-Q<sub>116</sub>, Q<sub>112</sub>-G<sub>118</sub>, G<sub>118</sub>-Q<sub>128</sub>, Q<sub>121</sub>-<br/> K<sub>129</sub>, Q<sub>128</sub>-F<sub>133</sub>, V<sub>130</sub>-V<sub>141</sub>, G<sub>136</sub>-E<sub>153</sub>,<br/> P<sub>142</sub>-W<sub>147</sub>, E<sub>169</sub>-Q<sub>174</sub>, N<sub>170</sub>-N<sub>184</sub>,<br/> R<sub>178</sub>-Y<sub>192</sub>, E<sub>186</sub>-L<sub>190</sub>, E<sub>186</sub>-S<sub>200</sub>, E<sub>188</sub>-Q<sub>197</sub>,<br/> F<sub>189</sub>-Q<sub>195</sub>, L<sub>190</sub>-K<sub>204</sub>, Q<sub>194</sub>-Q<sub>208</sub>, Q<sub>195</sub>-<br/> Q<sub>201</sub>, G<sub>199</sub>-G<sub>205</sub>, G<sub>214</sub>-F<sub>225</sub>, S<sub>219</sub>-N<sub>233</sub>,<br/> S<sub>249</sub>-A<sub>263</sub>, K<sub>256</sub>-V<sub>261</sub>, G<sub>257</sub>-Q<sub>271</sub>, Q<sub>283</sub>-</p> | <p><math>\alpha</math>-helix, <math>\beta</math>-sheet,<br/>and random coil</p> |
| 11S<br>glycinin<br>G2 (Gly<br>m 6.02) | 53 |  |                                                                                                                                                                                                                                                                                                                                                                                                                                                                                                                                                                                                                                                                                                                                                                                                                                                                                                                                                                                                                                                                                                                                                                                                                                                                                                                                                                                                                                                                                                                                                                                                                                                                                                                                                                                                                                                                                                                                                                                                                                                                                                                                                                                                                                                                                                                                                                                                                                                                                                                                                                                                                                                                        | <p><math>\alpha</math>-helix, <math>\beta</math>-sheet,<br/>and random coil</p> |

C<sub>291</sub>, G<sub>329</sub>-W<sub>343</sub>, L<sub>337</sub>-Y<sub>351</sub>, L<sub>345</sub>-M<sub>359</sub>,  
 S<sub>353</sub>-N<sub>367</sub>, M<sub>359</sub>-Y<sub>373</sub>, V<sub>361</sub>-L<sub>375</sub>, N<sub>367</sub>-  
 V<sub>381</sub>, N<sub>369</sub>-V<sub>383</sub>, V<sub>449</sub>-Q<sub>463</sub>, Q<sub>451</sub>-K<sub>465</sub>,  
 K<sub>457</sub>-S<sub>471</sub>

|                    |    |                                                                                                                                                                                                                                                                                                                                                                                                                                                                                                                                                                                                                                                                  |                                                     |
|--------------------|----|------------------------------------------------------------------------------------------------------------------------------------------------------------------------------------------------------------------------------------------------------------------------------------------------------------------------------------------------------------------------------------------------------------------------------------------------------------------------------------------------------------------------------------------------------------------------------------------------------------------------------------------------------------------|-----------------------------------------------------|
| 11S                |    | C <sub>17</sub> -F <sub>22</sub> , F <sub>20</sub> -Q <sub>27</sub> , R <sub>81</sub> -T <sub>85</sub> , E <sub>90</sub> -G <sub>96</sub> , Y <sub>92</sub> -<br>I <sub>99</sub> , E <sub>113</sub> -G <sub>118</sub> ,                                                                                                                                                                                                                                                                                                                                                                                                                                          |                                                     |
| glycinin           | 22 | E <sub>113</sub> -H <sub>127</sub> , Q <sub>115</sub> -R <sub>122</sub> , D <sub>125</sub> -F <sub>133</sub> , I <sub>130</sub> -E <sub>135</sub> ,<br>I <sub>139</sub> -F <sub>145</sub> ,                                                                                                                                                                                                                                                                                                                                                                                                                                                                      | $\beta$ -sheet and<br>random coil                   |
| G3 (Gly<br>m 6.03) |    | F <sub>168</sub> -Q <sub>174</sub> , P <sub>176</sub> -Y <sub>180</sub> , R <sub>177</sub> -L <sub>190</sub> , G <sub>183</sub> -<br>Q <sub>187</sub> , F <sub>189</sub> -Q <sub>195</sub> , G <sub>259</sub> -P <sub>266</sub> , P <sub>266</sub> -Q <sub>272</sub> ,<br>R <sub>274</sub> -P <sub>281</sub> , E <sub>278</sub> -E <sub>285</sub> , Q <sub>291</sub> -N <sub>296</sub> , T <sub>314</sub> -F <sub>320</sub><br>E <sub>31</sub> -N <sub>36</sub> , L <sub>40</sub> -H <sub>44</sub> , V <sub>46</sub> -G <sub>51</sub> , N <sub>57</sub> -K <sub>72</sub> , S <sub>58</sub> -<br>L <sub>63</sub> , G <sub>67</sub> -K <sub>72</sub> ,             |                                                     |
| 11S                |    | N <sub>78</sub> -P <sub>83</sub> , K <sub>128</sub> -D <sub>133</sub> , N <sub>142</sub> -V <sub>148</sub> , G <sub>152</sub> -A <sub>167</sub> ,<br>Q <sub>215</sub> -Q <sub>220</sub> ,                                                                                                                                                                                                                                                                                                                                                                                                                                                                        | $\alpha$ -helix, $\beta$ -sheet,<br>and random coil |
| glycinin           | 23 | I <sub>262</sub> -Q <sub>277</sub> , G <sub>268</sub> -P <sub>274</sub> , Q <sub>279</sub> -E <sub>284</sub> , D <sub>292</sub> -K <sub>307</sub> ,<br>G <sub>336</sub> -E <sub>341</sub> , P <sub>364</sub> -R <sub>370</sub> , A <sub>394</sub> -A <sub>399</sub> , A <sub>394</sub> -I <sub>409</sub> ,<br>A <sub>399</sub> -S <sub>414</sub> , S <sub>414</sub> -Y <sub>429</sub> , Q <sub>421</sub> -Y <sub>428</sub> , A <sub>508</sub> -Y <sub>512</sub><br>N <sub>77</sub> -H <sub>82</sub> , N <sub>79</sub> -S <sub>85</sub> , L <sub>83</sub> -Y <sub>89</sub> , Y <sub>86</sub> -Q <sub>91</sub> , A <sub>105</sub> -<br>P <sub>110</sub> ,          |                                                     |
| 11S                |    | G <sub>108</sub> -E <sub>114</sub> , H <sub>140</sub> -G <sub>144</sub> , L <sub>147</sub> -G <sub>152</sub> , E <sub>163</sub> -I <sub>168</sub> ,<br>D <sub>194</sub> -T <sub>200</sub> , K <sub>214</sub> -E <sub>222</sub> , G <sub>226</sub> -L <sub>237</sub> , K <sub>250</sub> -<br>D <sub>256</sub> , S <sub>272</sub> -Q <sub>276</sub> , W <sub>275</sub> -D <sub>282</sub> , D <sub>284</sub> -G <sub>290</sub> ,                                                                                                                                                                                                                                    | $\alpha$ -helix, $\beta$ -sheet,<br>and random coil |
| glycinin           | 33 | T <sub>292</sub> -P <sub>297</sub> , R <sub>299</sub> -H <sub>305</sub> , E <sub>311</sub> -P <sub>320</sub> , E <sub>313</sub> -P <sub>324</sub> ,<br>Q <sub>317</sub> -H <sub>322</sub> , P <sub>320</sub> -Q <sub>325</sub> , Q <sub>325</sub> -E <sub>334</sub> , Q <sub>332</sub> -<br>G <sub>337</sub> , R <sub>336</sub> -Q <sub>341</sub> , G <sub>339</sub> -N <sub>344</sub> , A <sub>433</sub> -E <sub>438</sub> ,<br>T <sub>469</sub> -A <sub>473</sub> , V <sub>474</sub> -K <sub>479</sub> , L <sub>490</sub> -N <sub>495</sub> , N <sub>492</sub> -<br>G <sub>497</sub> , N <sub>509</sub> -N <sub>515</sub> , G <sub>510</sub> -N <sub>514</sub> |                                                     |

---
